# Supplementary material
Source: PubMed Central journal article supplement (PMC1913725)
Supplement: plntcell_tpc.107.051367_1.pdf [file plntcell_tpc.107.051367_1.pdf]

# Supplemental Figure 1

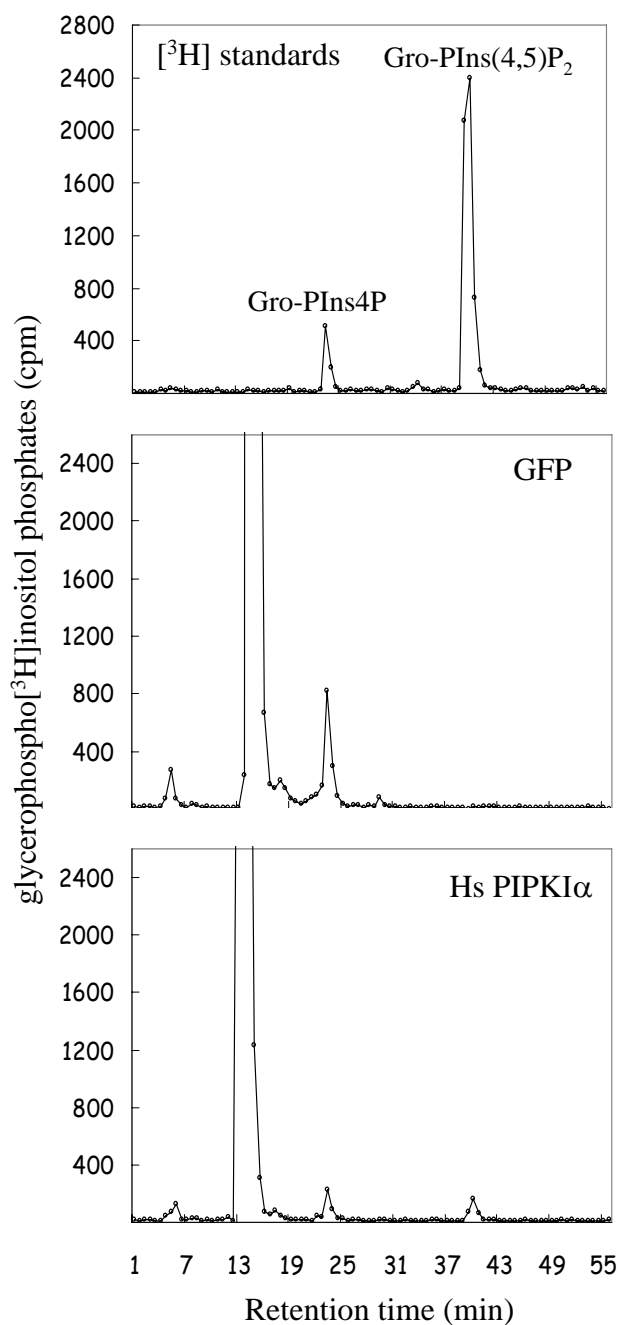

Tobacco cells were labeled *in vivo* with *myo*-[2-<sup>3</sup>H]inositol for 24 hours, and the lipids were extracted and deacylated [<sup>3</sup>H] inositol-labeled glycerol (Gro)-PIInsP and Gro-PIInsP<sub>2</sub> were analyzed by HPLC. The positions of glycerophosphoinositol phosphate standards are indicated. Equal amounts of total counts were analyzed for each sample.
