# Supplementary material
Source: PubMed Central journal article supplement (PMC1913725)
Supplement: plntcell_tpc.107.051367_2.pdf [file plntcell_tpc.107.051367_2.pdf]

# Supplemental Figure 2

A.

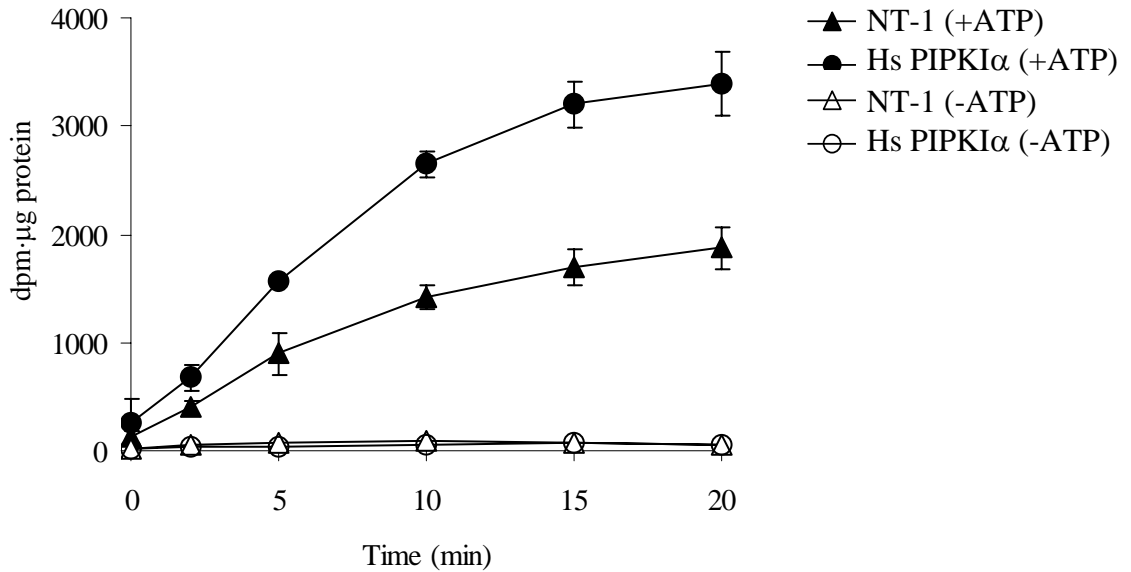

B.

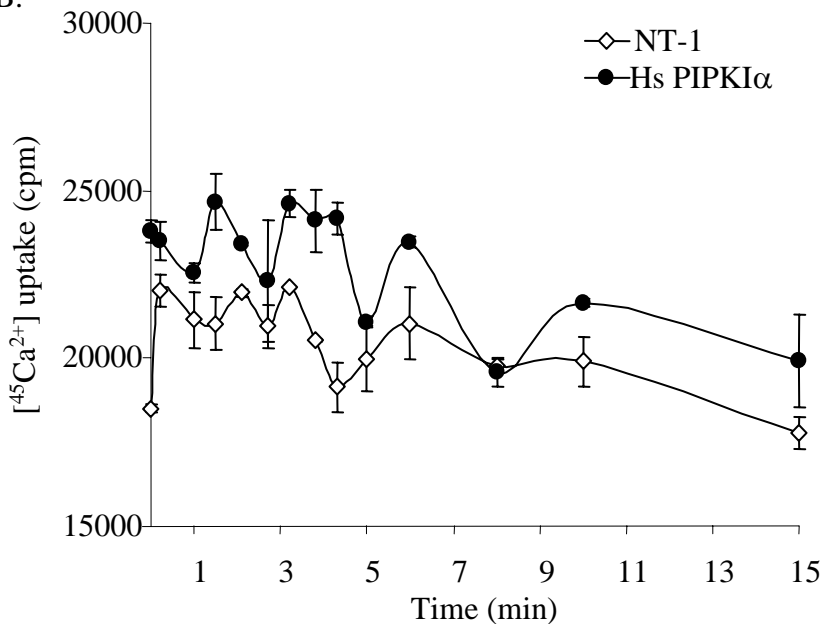

Increased  $\text{Ca}^{2+}$  uptake in Hs PIPKI $\alpha$  cells. A. Mitochondria-enriched membrane vesicles were prepared from wild type (triangle) and Hs PIPKI $\alpha$  (circle) as described in materials and methods.  $^{45}\text{Ca}^{2+}$  (2  $\mu\text{Ci}$ ) was added and uptake was monitored. The ATP-dependent  $^{45}\text{Ca}^{2+}$  uptake (10  $\mu\text{g}$  protein aliquot $^{-1}$ ) was measured in presence (closed) and absence (open) of 3 mM ATP. The radioactivity was measured in a scintillation counter. Data are the averages  $\pm$  SD of duplicates from 2 independent experiments. B. Hs PIPKI $\alpha$  lines had consistently more  $^{45}\text{Ca}^{2+}$  uptake. Cells (1g fresh wt) were pre-equilibrated in 5 mL conditioned medium;  $^{45}\text{Ca}^{2+}$  (3.5  $\mu\text{Ci}$ ) was added and uptake was monitored. Values are averages of from one representative experiment. The experiment was repeated 4 times with similar results. The averages of the maximum values from 4 experiments were:  $26,214 \pm 1,401$  cpm  $^{45}\text{Ca}^{2+}$ /min·g fresh wt for the Hs PIPKI $\alpha$  line and  $22,359 \pm 1,655$  cpm  $^{45}\text{Ca}^{2+}$ /min·g fresh wt for the wild type.
