# Supplementary material
Source: PubMed Central journal article supplement (PMC1913725)
Supplement: plntcell_tpc.107.051367_4.pdf [file plntcell_tpc.107.051367_4.pdf]

## Supplemental Figure 4

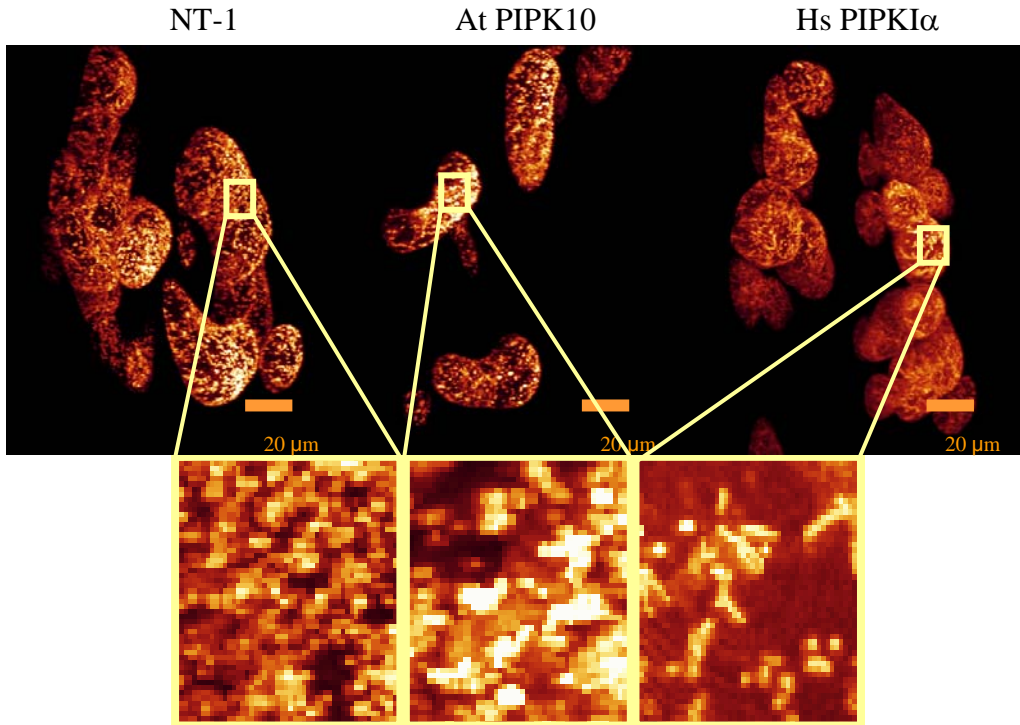

Mitochondria of wild type and transgenic At PIPK10 and Hs PIPK1 $\alpha$  tobacco cells were visualized using rhodamine123 and imaged using Leica confocal microscope (TSC SP). Rhodamine123 diffused out of transgenic Hs PIPK1 $\alpha$  tobacco cells more readily as shown by the increased fluorescence in the cytosol.
