# Supplementary material
Source: PubMed Central journal article supplement (PMC1913725)

# Supplemental Figure 5

NT-1

Wild type and transgenic At PIPK10 and Hs PIPKI $\alpha$  tobacco cells were visualized using rhodamine phalloidin and imaged using Leica confocal microscope (TSC SP1).

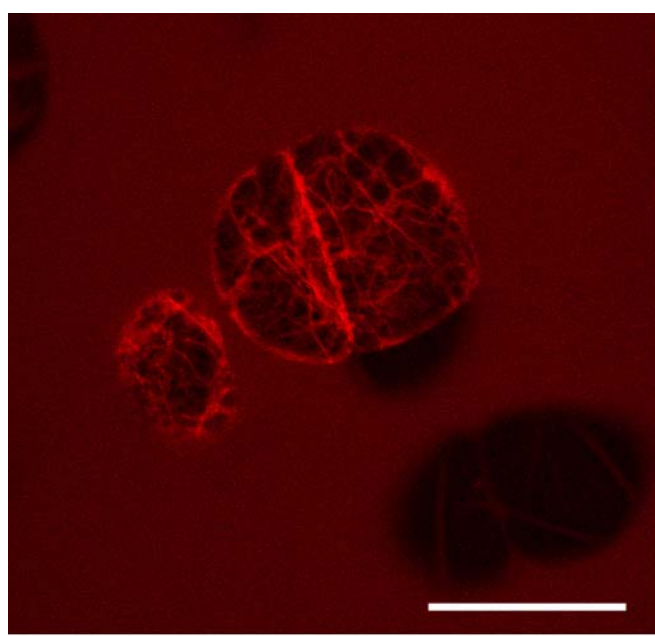

At PIPK10

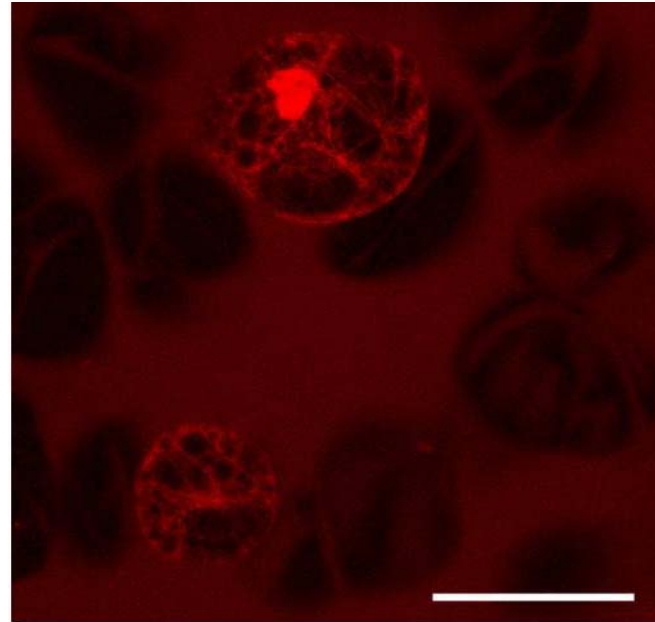

Hs PIPKI $\alpha$

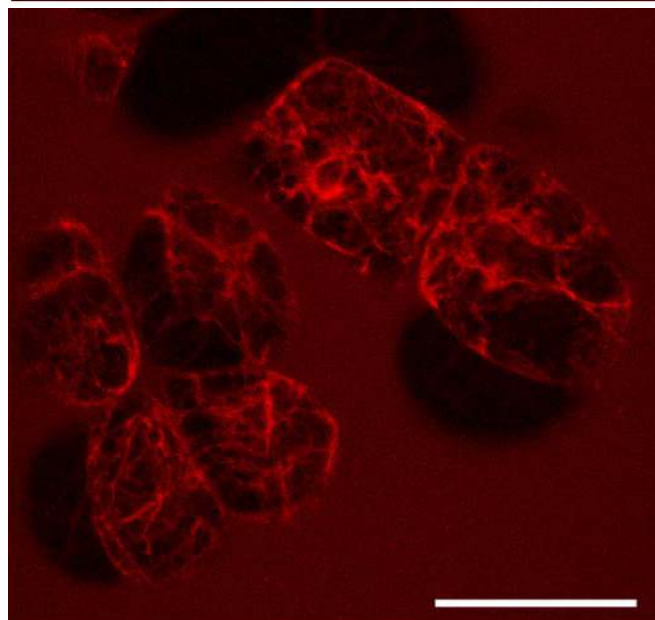

Supplement: plntcell_tpc.107.051367_5.pdf [file plntcell_tpc.107.051367_5.pdf]
